# Supplementary material for: Overexpression of Myo1e promotes albumin endocytosis by mouse glomerular podocytes mediated by Dynamin
Source: PeerJ. 2020 Mar 17;8:e8599. doi: 10.7717/peerj.8599 (PMC7083160; doi:10.7717/peerj.8599)
Supplement: Table S1 [file peerj-08-8599-s001.xlsx]

## Sheet: Sheet1
	cell：	MPC5
	Experimental grouping：
		（1） blank group
		（2） 100ug/ml group
		（3） 250ug/ml group
		（4） 500ug/ml group
		（5） 1mg/ml group
														P value	< 0.0001
														P value summary	***
		Experimental grouping	Positive rate（%）											Tukey's Multiple Comparison Test	Significant? P < 0.05?	Summary
		blank	0.01	0	0.01									blank vs 100ug/ml	No	ns
		100ug/ml	0.29	0.22	0.33									blank vs 250ug/ml	Yes	***
		250ug/ml	5.18	5.2	5.04									blank vs 500ug/ml	Yes	***
		500ug/ml	12.75	12.85	12.31									blank vs 1mg/ml	Yes	***
		1mg/ml	16.11	15.91	14.59									100ug/ml vs 250ug/ml	Yes	***
														100ug/ml vs 500ug/ml	Yes	***
														100ug/ml vs 1mg/ml	Yes	***
														250ug/ml vs 500ug/ml	Yes	***
														250ug/ml vs 1mg/ml	Yes	***
														500ug/ml vs 1mg/ml	Yes	***
