# Supplementary material for: Overexpression of Myo1e promotes albumin endocytosis by mouse glomerular podocytes mediated by Dynamin
Source: PeerJ. 2020 Mar 17;8:e8599. doi: 10.7717/peerj.8599 (PMC7083160; doi:10.7717/peerj.8599)
Supplement: Table S2 [file peerj-08-8599-s002.xlsx]

## Sheet: Sheet1
	concentration(uM)	OD490			blank	OD490-blank			average	Survival rate			average
MG-63 ADM	blank	0.7	0.634	0.693	0.0216667	0.678333	0.612333	0.671333	0.654	1.03721	0.93629	1.0265	1
	100 ug/ml	0.669	0.622	0.672		0.647333	0.600333	0.650333		0.989806	0.917941	0.994393	0.96738
	250ug/ml	0.489	0.477	0.485		0.467333	0.455333	0.463333		0.714577	0.696228	0.708461	0.706422
	500ug/ml	0.273	0.27	0.276		0.251333	0.248333	0.254333		0.384302	0.379715	0.388889	0.384302
	1mg/ml	0.085	0.081	0.082		0.0633333	0.0593333	0.0603333		0.09684	0.0907238	0.0922528	0.0932722
	blank	0.02	0.024	0.021
							P value	< 0.0001
							P value summary	***
							Tukey's Multiple Comparison Test	Significant? P < 0.05?	Summary
							blank vs 100 ug/ml	No	ns
							blank vs 250ug/ml	Yes	***
							blank vs 500ug/ml	Yes	***
							blank vs 1mg/ml	Yes	***
							100 ug/ml vs 250ug/ml	Yes	***
							100 ug/ml vs 500ug/ml	Yes	***
							100 ug/ml vs 1mg/ml	Yes	***
							250ug/ml vs 500ug/ml	Yes	***
							250ug/ml vs 1mg/ml	Yes	***
							500ug/ml vs 1mg/ml	Yes	***
