# Supplementary material for: Overexpression of Myo1e promotes albumin endocytosis by mouse glomerular podocytes mediated by Dynamin
Source: PeerJ. 2020 Mar 17;8:e8599. doi: 10.7717/peerj.8599 (PMC7083160; doi:10.7717/peerj.8599)
Supplement: Table S4 [file peerj-08-8599-s004.xlsx]

## Sheet: Sheet1
	Cell：	MPC5
	Experimental grouping：
		（1） normal MPC5 grouping
		（2） Myole Interference idling grouping
		（3）Myole interference grouping
		（4）Myole Overexpression no load grouping
		（5） Myole Overexpression grouping
		Experimental grouping	UR	LR	Total		AVERAGE
		MPC5	0.98	2.92	3.9		3.87667
			1.14	2.88	4.02
			1.04	2.67	3.71
		Myole Interference idling grouping	1.54	2.47	4.01		3.87667
			1.24	2.36	3.6
			1.55	2.47	4.02
		Myole interference grouping	0.98	2.49	3.47		3.47333
			1.05	2.41	3.46
			1	2.49	3.49
		Myole Overexpression no load grouping	1.75	2.25	4		3.99333
			1.72	2.5	4.22
			1.48	2.28	3.76
		Myole Overexpression grouping	2.75	5.15	7.9		8
			2.69	5.1	7.79
			2.96	5.35	8.31
