# Supplementary material for: Overexpression of Myo1e promotes albumin endocytosis by mouse glomerular podocytes mediated by Dynamin
Source: PeerJ. 2020 Mar 17;8:e8599. doi: 10.7717/peerj.8599 (PMC7083160; doi:10.7717/peerj.8599)
Supplement: Table S5 [file peerj-08-8599-s005.xlsx]

## Sheet: Sheet1
	Cell：	MPC5
	Experimental grouping：
		（1）BLANK
		（2）Myole Overexpression no load
		（3）Myole Overexpression no load+ Dynasore（160uM）
		（4）Myole Overexpression
		（5）Myole Overexpression+Dynasore（160uM）
		Experimental grouping	Positive rate
		BLANK	1.15	0.81	0.56
		Myole Overexpression no load	12.23	13.13	12.44
		Myole Overexpression no load+ Dynasore（160uM）	8.23	7.86	8.82
		Myole Overexpression	14.56	14.97	14.9
		Myole Overexpression+Dynasore（160uM）	11.3	10.09	8.89
							P value	< 0.0001
							P value summary	***
							Tukey's Multiple Comparison Test	Significant? P < 0.05?	Summary
							Myole Overexpression no load vs Myole Overexpression no load+ Dynasore	Yes	***
							Myole Overexpression no load vs Myole Overexpression son Test	Yes	*
							Myole Overexpression no load vs Myole Overexpression+Dynasore	Yes	**
							Myole Overexpression no load+ Dynasore（160 vs Myole Overexpression M）	Yes	***
							Myole Overexpression no load+ Dynasore（160 vs Myole Overexpression+Dynasore（160uM）	No	ns
							Myole Overexpression vs Myole Overexpression+Dynasore	Yes	***
