# Supplementary material for: Overexpression of Myo1e promotes albumin endocytosis by mouse glomerular podocytes mediated by Dynamin
Source: PeerJ. 2020 Mar 17;8:e8599. doi: 10.7717/peerj.8599 (PMC7083160; doi:10.7717/peerj.8599)
Supplement: Table S6 [file peerj-08-8599-s006.xlsx]

## Sheet: Sheet1
Well	Fluor	Target	Content	Sample	Cq		Group				Group
A01	SYBR	GAPDH	Unkn	Myo1e Overexpression no load	14.1534			Myo1e Overexpression no load	Myo1e Overexpression			Myo1e Interference no-load	Myo1e Interference
A02	SYBR	GAPDH	Unkn	Myo1e Overexpression no load	14.0474		GAPDH	14.1534	14.5287		GAPDH	14.24	14.4628
A03	SYBR	GAPDH	Unkn	Myo1e Overexpression no load	14.0672			14.0474	14.2204			14.2493	14.4858
A04	SYBR	GAPDH	Unkn	Myo1e Overexpression	14.5287			14.0672	14.4569			14.4194	14.2283
A05	SYBR	GAPDH	Unkn	Myo1e Overexpression	14.2204
A06	SYBR	GAPDH	Unkn	Myo1e Overexpression	14.4569		Myo1e	29.0729	23.5949		Myo1e	28.2288	30.3088
A07	SYBR	GAPDH	Unkn	Myo1e Interference no-load	14.24			29.2333	23.6183			28.7693	30.7107
A08	SYBR	GAPDH	Unkn	Myo1e Interference no-load	14.2493			29.452	23.7858			28.7898	30.7879
A09	SYBR	GAPDH	Unkn	Myo1e Interference no-load	14.4194
A10	SYBR	GAPDH	Unkn	Myo1e Interference	14.4628		ΔCT	14.9195	9.06618		ΔCT	13.9888	15.846
A11	SYBR	GAPDH	Unkn	Myo1e Interference	14.4858			15.1859	9.39787			14.52	16.2249
A12	SYBR	GAPDH	Unkn	Myo1e Interference	14.2283			15.3849	9.32886			14.3705	16.5596
B01	SYBR	Myo1e	Unkn	Myo1e Overexpression no load	29.0729
B02	SYBR	Myo1e	Unkn	Myo1e Overexpression no load	29.2333		ΔCT(-)	15.1634			ΔCT(-)	14.2931
B03	SYBR	Myo1e	Unkn	Myo1e Overexpression no load	29.452
B04	SYBR	Myo1e	Unkn	Myo1e Overexpression	23.5949		ΔΔCT	-0.24391	-6.09725		ΔΔCT	-0.304306	1.55291
B05	SYBR	Myo1e	Unkn	Myo1e Overexpression	23.6183			0.0224663	-5.76556			0.226922	1.93178
B06	SYBR	Myo1e	Unkn	Myo1e Overexpression	23.7858			0.221444	-5.83457			0.0773834	2.2665
B07	SYBR	Myo1e	Unkn	Myo1e Interference no-load	28.2288
B08	SYBR	Myo1e	Unkn	Myo1e Interference no-load	28.7693		2-ΔΔCT	1.1842	68.4627		2-ΔΔCT	1.23482	0.340821
B09	SYBR	Myo1e	Unkn	Myo1e Interference no-load	28.7898			0.984548	54.401			0.854456	0.262105
B10	SYBR	Myo1e	Unkn	Myo1e Interference	30.3088			0.857707	57.0663			0.947775	0.207834
B11	SYBR	Myo1e	Unkn	Myo1e Interference	30.7107
B12	SYBR	Myo1e	Unkn	Myo1e Interference	30.7879		mean	1.00882	59.9767		mean	1.01235	0.270253
							SD	0.164593	7.46895		SD	0.198236	0.066867
							P value	0.0002			P value	0.0036
							P value summary	***			P value summary	**
							Are means signif. different? (P < 0.05)	Yes			Are means signif. different? (P < 0.05)	Yes
